# Supplementary material for: Comparison of risk allele frequencies of single nucleotide polymorphisms associated with age-related macular degeneration in different ethnic groups
Source: BMC Ophthalmol. 2021 Feb 22;21:97. doi: 10.1186/s12886-021-01830-9 (PMC7898441; doi:10.1186/s12886-021-01830-9)
Supplement: Supplementary file 5 — Additional file 5 Supplemental Table 2 Effect allele frequencies (EAFs) of any age-related macular degeneration-related single nucleotide polymorphisms in East Asian groups, including Koreans. [file 12886_2021_1830_MOESM5_ESM.xlsx]

## Sheet: armd_eas_fisher_input
	Supplemental Table 2. Effect allele frequencies (EAFs) of any age-related macular degeneration-related single nucleotide polymorphisms in East Asian groups, including Koreans
	SNP ID	Chr	Position	Function	Ref allele	Alt allele	Nearby/containing Gene	Global East Asian EAF	CHS EAF	CHS log10P	CDX EAF	CDX log10P	KHV EAF	KHV log10P	CHB EAF	CHB log10P	JPT EAF	JPT log10P	KOR EAF	KOR log10P
	rs10033900	chr4	110659067	intergenic	T	C	CFI	0.39	0.385714	0	0.446237	0.746734	0.434343	0.387245	0.31068	-1.21724	0.370192	-0.165082	0.337013	-2.01932
	rs10191751	chr2	12962315	intergenic	A	G	TRIB2	0.87	0.861905	0	0.860215	-0.00731809	0.878788	0.0205905	0.88835	0.100416	0.870192	0	0.869843	0
	rs10406174	chr19	3944240	ncRNA_intronic	G	A	MIR1268A	0.051	0.0285714	-0.300133	0.0376344	-0.18829	0.0151515	-0.893775	0.0776699	0.494731	0.0913462	1.10662	0.0752033	1.70197
	rs10468017	chr15	58678512	intergenic	C	T	AQP9;LIPC	0.19	0.171429	-0.0199908	0.22043	0.310719	0.191919	0.001166	0.145631	-0.499409	0.235577	0.614952	0.213454	0.691886
	rs10490924	chr10	124214448	exonic	G	T	ARMS2/HTRA1	0.4	0.385714	-0.00500089	0.397849	0	0.409091	0.0438323	0.427184	0.322493	0.399038	0	0.413713	0.278704
	rs1061147	chr1	196654324	exonic	A	C	CFH	0.95	0.961905	0.00500089	0.978495	0.473462	0.959596	0.0438323	0.92233	-0.336778	0.932692	-0.251343	0.9233	-2.00817
	rs1061170	chr1	196659237	exonic	C	T	CFH	0.95	0.961905	0.0199908	0.978495	0.822902	0.959596	0.0527234	0.927184	-0.398466	0.932692	-0.349991	0.922429	-2.01932
	rs10733086	chr1	196676935	intronic	A	T	CFH	0.94	0.961905	0.0655588	0.967742	0.387303	0.934343	-0.0368286	0.902913	-0.494731	0.913462	-0.384834	0.900349	-3.22745
	rs10737680	chr1	196679455	intronic	A	C	CFH	0.42	0.457143	0.143768	0.494624	1.14922	0.368687	-0.433693	0.354369	-0.707032	0.451923	0.341326	0.45122	0.847011
	rs1077952	chr11	125172383	intronic	C	A	PKNOX2	0.33	0.361905	0.0199908	0.284946	-0.305016	0.343434	0.0368286	0.412621	0.499409	0.240385	-0.863764	0.321325	-0.177258
	rs10781182	chr9	76617720	intergenic	T	G	MIR6130/RORB	0.49	0.514286	0.00500089	0.543011	0.335408	0.494949	0.001166	0.495146	0	0.413462	-0.614952	0.413953	-3.64098
	rs10801555	chr1	196660261	intronic	A	G	CFH	0.95	0.961905	0.00500089	0.978495	0.473462	0.959596	0.0438323	0.927184	-0.322493	0.932692	-0.251343	0.922719	-2.01932
	rs10830228	chr11	88891114	intergenic	A	G	GRM5;TYR	0.67	0.719048	0.143768	0.639785	-0.156399	0.712121	0.132925	0.679612	0.0368098	0.620192	-0.374452	0.673345	0.0534061
	rs10922109	chr1	196704632	intronic	C	A	CFH	0.44	0.457143	0	0.505376	0.473462	0.39899	-0.132925	0.378641	-0.389552	0.466346	0.107424	0.470657	0.797356
	rs11080055	chr17	26649724	intronic	A	C	TMEM97/VTN	0.72	0.804762	0.615555	0.629032	-0.864815	0.631313	-0.600153	0.737864	0.0768539	0.769231	0.374452	0.75842	1.36217
	rs11131465	chr4	64360713	intergenic	T	C	ADGRL3-AS1;TECRL	0.24	0.309524	0.300133	0.204301	-0.211442	0.19697	-0.150298	0.242718	0	0.230769	0	0.224128	-0.381775
	rs11132213	chr4	184834911	intronic	C	A	STOX2	0.68	0.671429	0	0.688172	0	0.641414	-0.132925	0.626214	-0.322493	0.759615	0.614952	0.656014	-0.565253
	rs11170417	chr12	53500947	intronic	C	T	SOAT2	0.17	0.157143	0	0.129032	-0.338412	0.106061	-0.498906	0.194175	0.157876	0.259615	1.20856	0.196574	0.938674
	rs11184959	chr1	107213976	intergenic	G	A	LINC01677;LINC01661	0.21	0.214286	0	0.129032	-0.971191	0.156566	-0.338594	0.286408	0.525775	0.25	0.322778	0.27381	3.32548
	rs11200638	chr10	124220544	upstream	G	A	HTRA1	0.41	0.4	0	0.408602	0	0.393939	-0.0438323	0.436893	0.182367	0.413462	0	0.423837	0.278704
	rs113544501	chr10	86411554	intergenic	C	T	CCSER2;LINC01519	0.001	0	0	0	0	0	0	0.00485437	0.216504	0	0	0.000582072	-0.213839
	rs113553030	chr11	77756476	intronic	T	A	KCTD14;NDUFC2-KCTD14	0.091	0.12381	0.143768	0.123656	0.364413	0.0858586	-0.00519499	0.0679612	-0.190441	0.0576923	-0.424967	0.0690157	-1.2485
	rs1142	chr7	104756326	downstream	C	T	KMT2E/SRPK2	0.37	0.352381	0	0.467742	0.864815	0.393939	0.0527234	0.368932	0	0.259615	-1.28442	0.335851	-1.0115
	rs11545434	chr9	82340765	UTR3	G	A	TLE4	0.001	0	0	0.00537634	0.239912	0	0	0	0	0	0	0.00261932	0.258058
	rs11755724	chr6	7118990	intronic	A	G	RREB1	0.006	0.0047619	0	0	-0.0654437	0.020202	0.387245	0.00485437	0	0	-0.0770454	0.00262085	-0.691886
	rs11884770	chr2	228086920	ncRNA_intronic	T	C	COL4A3	0.78	0.780952	0	0.811828	0.18829	0.843434	0.433693	0.757282	-0.11823	0.730769	-0.393037	0.7638	-0.355735
	rs12019136	chr19	5835677	intronic	G	A	C3	0.14	0.0809524	-0.390705	0.290323	3.56824	0.212121	0.600153	0.101942	-0.322493	0.0384615	-2.66444	0.0772145	-6.58275
	rs12153855	chr6	32074804	intronic	T	C	TNXB	0.037	0.0333333	0	0.0107527	-0.548205	0.0555556	0.132925	0.0728155	0.499409	0.00961538	-0.614952	0.0630447	2.09712
	rs12357257	chr10	24999593	intronic	G	A	ARHGAP21	0.053	0.0238095	-0.289698	0.112903	1.14922	0.0808081	0.265527	0.0194175	-0.499409	0.0336538	-0.251343	0.0340711	-1.57524
	rs12411753	chr10	3887162	intergenic	G	A	LOC105376365;MIR6078	0.24	0.257143	0.00500089	0.16129	-0.822902	0.247475	0.0174448	0.286408	0.322493	0.25	0	0.251598	0.252903
	rs12498917	chr4	40304747	intergenic	A	T	RHOH;LINC02265	0.001	0	0	0.00537634	0.239912	0	0	0	0	0	0	0.000291036	-0.279502
	rs12930861	chr16	10586102	intergenic	C	G	ATF7IP2;EMP2	0.13	0.152381	0.0199908	0.129032	0	0.0808081	-0.405464	0.15534	0.21492	0.125	0	0.157085	1.07705
	rs13081855	chr3	99481539	ncRNA_intronic	G	T	COL8A1/FILIP1L	0.049	0.0380952	-0.00500089	0.0483871	0	0.0707071	0.133112	0.0533981	0.0493772	0.0336538	-0.142347	0.0272938	-2.02534
	rs13095226	chr3	99396272	ncRNA_intronic	T	C	MIR548G	0.069	0.0761905	0	0.0322581	-0.548205	0.0858586	0.0527234	0.0582524	-0.081583	0.0865385	0.200495	0.0961092	1.57524
	rs13278062	chr8	23082971	ncRNA_exonic	G	T	TNFRSF10A	0.34	0.380952	0.143768	0.295699	-0.473462	0.353535	0.0438323	0.271845	-0.671546	0.399038	0.614952	0.378999	1.16252
	rs1329424	chr1	196646176	intronic	T	G	CFH	0.95	0.961905	0.0199908	0.978495	0.822902	0.959596	0.0527234	0.927184	-0.398466	0.932692	-0.349991	0.921848	-2.02534
	rs1329428	chr1	196702810	intronic	C	T	CFH	0.44	0.457143	0	0.505376	0.473462	0.39899	-0.132925	0.378641	-0.389552	0.466346	0.107424	0.470383	0.769906
	rs1355023	chr6	106252999	intergenic	T	C	PREP;PRDM1	0.41	0.371429	-0.0289845	0.494624	0.726407	0.449495	0.132925	0.373786	-0.190441	0.370192	-0.250134	0.334689	-3.77432
	rs1359191	chr13	67550996	intronic	C	T	PCDH9	0.63	0.590476	-0.0289845	0.693548	0.473462	0.722222	0.600153	0.597087	-0.180942	0.543269	-0.626735	0.516551	-7.79267
	rs139161960	chr5	29538166	intergenic	T	G	LINC02064;LOC105374704	0.5	0.480952	0	0.553763	0.335408	0.525253	0.0527234	0.470874	-0.132474	0.475962	-0.107424	0.463188	-1.05083
	rs1410996	chr1	196696933	intronic	G	A	CFH	0.42	0.457143	0.0289845	0.494624	0.55851	0.373737	-0.132925	0.354369	-0.398466	0.447115	0.132738	0.448576	0.747522
	rs1445653	chr2	155661432	intronic	A	G	KCNJ3	0.44	0.42381	0	0.446237	0	0.429293	-0.0205905	0.485437	0.257147	0.423077	-0.0227858	0.420686	-0.384788
	rs1626340	chr9	101923372	intergenic	G	A	TGFBR1/COL15A1	0.46	0.37619	-0.369991	0.526882	0.473462	0.383838	-0.433693	0.504854	0.257147	0.519231	0.432354	0.514526	2.00817
	rs16851585	chr1	177568799	intergenic	C	G	LINC01645;LINC01741	0.39	0.385714	0	0.354839	-0.173804	0.30303	-0.498906	0.407767	0.0821284	0.514423	1.55505	0.494774	6.58275
	rs17050244	chr2	121282630	intergenic	A	G	LINC01101;GLI2	0.24	0.242857	0	0.354839	1.39787	0.29798	0.369146	0.169903	-0.499409	0.129808	-1.94103	0.209181	-1.06861
	rs17073641	chr18	62418444	intergenic	A	C	LINC01924;CDH7	0.4	0.37619	-0.00500089	0.349462	-0.310719	0.358586	-0.132925	0.5	0.707032	0.394231	0	0.381174	-0.381775
	rs1713985	chr4	57786450	intronic	G	T	REST	0.69	0.666667	-0.00500089	0.688172	0	0.686869	-0.001166	0.68932	0	0.716346	0.125144	0.72516	1.07801
	rs17231506	chr16	56994528	intergenic	C	T	HERPUD1;CETP	0.18	0.209524	0.0289845	0.177419	0	0.141414	-0.133112	0.169903	-0.022644	0.182692	0	0.161628	-0.525858
	rs17586843	chr4	116924184	intergenic	T	C	NDST4;MIR1973	0.14	0.109524	-0.0481326	0.107527	-0.239912	0.166667	0.132925	0.160194	0.155687	0.149038	0.00562626	0.114444	-1.11346
	rs181705462	chr6	31947027	intronic	G	T	C2/CFB/SKIV2L	0.003	0	0	0	0	0.00505051	0.0527234	0.00970874	0.305715	0	0	0.00245549	-0.119595
	rs1831282	chr1	196673993	intronic	A	C	CFH	0.95	0.961905	0.0199908	0.978495	0.822902	0.959596	0.0527234	0.927184	-0.398466	0.932692	-0.349991	0.922138	-2.02534
	rs1864163	chr16	56997233	intronic	G	A	CETP	0.13	0.128571	0	0.11828	-0.00731809	0.151515	0.0665858	0.140777	0.081583	0.134615	0	0.0941313	-2.03518
	rs1967689	chr1	208039471	intergenic	G	C	C1orf132;CD34	0.005	0	-0.0289845	0.00537634	0	0.010101	0.132925	0.00970874	0.225906	0	-0.250134	0.00522952	0
	rs2043085	chr15	58680954	intergenic	T	C	AQP9;LIPC	0.5	0.552381	0.143768	0.521505	0.0484898	0.550505	0.133112	0.524272	0.112309	0.375	-1.55505	0.481987	-0.353083
	rs2049622	chr7	42176282	intronic	G	A	GLI3	0.66	0.657143	0	0.768817	1.14922	0.762626	0.600153	0.524272	-1.24041	0.591346	-0.614952	0.621951	-1.11346
	rs2070895	chr15	58723939	upstream	G	A	LIPC	0.42	0.352381	-0.289698	0.370968	-0.310719	0.409091	-0.0205905	0.417476	0	0.528846	1.10966	0.426829	0.135137
	rs2071277	chr6	32171683	intronic	T	C	NOTCH4	0.43	0.366667	-0.164325	0.467742	0.216882	0.464646	0.0836573	0.378641	-0.322493	0.471154	0.252239	0.416667	-0.259237
	rs2075650	chr19	45395619	intronic	A	G	TOMM40	0.097	0.0571429	-0.788283	0.129032	0.55851	0.0707071	-0.387245	0.11165	0.190441	0.120192	0.384834	0.0920976	-0.169526
	rs2186849	chr18	2050381	intergenic	G	A	LINC00470;METTL4	0.2	0.152381	-0.143768	0.123656	-0.864815	0.126263	-0.600153	0.247573	0.335789	0.317308	1.94103	0.270482	4.14261
	rs2205502	chr21	21772340	intergenic	T	C	LINC01683;LINC00320	0.59	0.571429	0	0.548387	-0.239912	0.560606	-0.0527234	0.587379	0	0.663462	0.614952	0.610918	0.44177
	rs2230199	chr19	6718387	exonic	G	C	C3	0.003	0	-0.300133	0	-0.548205	0.00505051	0.0527234	0.00970874	0.499409	0	-0.614952	0.000588582	-0.847011
	rs2284665	chr10	124226630	intronic	G	T	HTRA1	0.43	0.414286	0	0.430108	0	0.444444	0.0438323	0.451456	0.0877348	0.418269	0	0.464535	0.960569
	rs2285714	chr4	110638810	exonic	C	T	PLA2G12A	0.2	0.195238	0	0.166667	-0.234484	0.207071	0.0174448	0.247573	0.335789	0.1875	-0.0227858	0.233295	1.12382
	rs2337055	chr22	46910630	intronic	T	G	CELSR1	0.76	0.771429	0	0.747312	-0.00731809	0.691919	-0.433693	0.791262	0.182367	0.769231	0	0.793605	1.19977
	rs2740488	chr9	107661742	intronic	A	C	ABCA1	0.24	0.261905	0.00500089	0.247312	0	0.19697	-0.150298	0.218447	-0.117887	0.288462	0.384834	0.257118	0.381775
	rs2839127	chr21	47573550	intronic	A	G	FTCD	0.98	0.990476	0.0199908	0.989247	0.0878567	0.984848	0	0.985437	0.0382453	0.971154	-0.165082	0.996219	4.35149
	rs2842339	chr14	68986999	intronic	G	A	RAD51B	0.98	1	0.329005	0.956989	-0.55851	0.974747	-0.0474296	0.980583	0	1	0.614952	0.999709	9.5066
	rs3130783	chr6	30774357	intergenic	G	A	IER3/DDR1	0.83	0.842857	0	0.919355	1.39787	0.873737	0.263811	0.820388	-0.0425216	0.701923	-2.43326	0.750145	-5.64152
	rs3138141	chr12	56115778	ncRNA_intronic	C	A	RDH5/CD63/MMP19	0.12	0.12381	0	0.16129	0.473462	0.186869	0.600153	0.092233	-0.225906	0.0384615	-1.97197	0.0669383	-5.27841
	rs334353	chr9	101908365	intronic	T	G	TGFBR1	0.43	0.333333	-0.62373	0.521505	0.804217	0.358586	-0.387245	0.461165	0.155687	0.490385	0.434	0.468623	1.11346
	rs3750846	chr10	124215565	intronic	T	C	ARMS2/HTRA1	0.41	0.385714	-0.00500089	0.403226	0	0.409091	0	0.427184	0.0821284	0.403846	0	0.417199	0.135137
	rs3750848	chr10	124215315	intronic	T	G	ARMS2/HTRA1	0.4	0.385714	0	0.397849	0	0.409091	0.0205905	0.427184	0.135597	0.399038	0	0.413713	0.278704
	rs3764261	chr16	56993324	intergenic	C	A	HERPUD1;CETP	0.17	0.204762	0.0660009	0.177419	0	0.141414	-0.115337	0.169903	0	0.177885	0.00123097	0.156886	-0.339794
	rs3793917	chr10	124219275	intergenic	C	G	ARMS2/HTRA1	0.41	0.4	0	0.408602	0	0.409091	0	0.436893	0.225906	0.408654	0	0.423881	0.278704
	rs380390	chr1	196701051	intronic	G	C	CFH	0.95	0.961905	0.00500089	0.978495	0.473462	0.959596	0.0438323	0.927184	-0.322493	0.932692	-0.251343	0.922184	-2.02534
	rs3812111	chr6	116443735	intronic	T	A	COL10A1	0.26	0.242857	0	0.268817	0	0.247475	-0.0232611	0.218447	-0.286988	0.3125	0.434	0.270773	0.224131
	rs406936	chr6	31933161	intronic	G	A	SKIV2L	0.097	0.0809524	-0.00500089	0.0752688	-0.173804	0.146465	0.433693	0.0873786	-0.0382453	0.0961538	0	0.142026	2.87857
	rs41278671	chr9	117401016	intronic	A	C	TMEM268	0.002	0	0	0	0	0.00505051	0.0693756	0.00485437	0.157538	0	0	0.000587889	-0.472715
	rs4293143	chr11	82821382	intergenic	T	G	RAB30-AS1;PCF11	0.18	0.209524	0.0289845	0.188172	0	0.227273	0.265527	0.135922	-0.322493	0.134615	-0.430254	0.186992	0.169526
	rs429358	chr19	45411941	exonic	T	C	APOE	0.086	0.0571429	-0.0897578	0.102151	0.131936	0.0909091	0.023349	0.101942	0.1274	0.0817308	0	0.0921283	0.169526
	rs429608	chr6	31930462	intronic	G	A	SKIV2L	0.08	0.0619048	-0.143768	0.0913978	0.156399	0.0656566	-0.132925	0.0728155	-0.0821284	0.110577	0.614952	0.102213	1.05586
	rs431911	chr11	115793206	intergenic	G	T	LINC00900;LOC101929011	0.52	0.561905	0.0289845	0.55914	0.216882	0.535354	0.0438323	0.441748	-0.499409	0.528846	0	0.509878	-0.177258
	rs4420638	chr19	45422946	downstream	A	G	APOE	0.099	0.0809524	-0.00500089	0.0967742	0	0.10101	0.00519499	0.126214	0.249075	0.0913462	0	0.109239	0.287773
	rs4698775	chr4	110590479	intronic	G	T	CFI	0.81	0.8	0	0.844086	0.239912	0.80303	-0.0174448	0.786408	-0.155687	0.798077	-0.0227858	0.7741	-1.31392
	rs4711751	chr6	43828582	intergenic	T	C	VEGFA;LINC01512	0.26	0.266667	0	0.236559	-0.108418	0.207071	-0.265527	0.271845	0.0493772	0.331731	0.614952	0.326264	3.2346
	rs4714888	chr6	45885061	intronic	G	T	CLIC5	0.099	0.104762	0	0.0860215	-0.016461	0.0808081	-0.0527234	0.0825243	-0.11823	0.139423	0.471035	0.156886	4.3618
	rs4815244	chr20	23858984	intronic	G	T	CST5	0.54	0.519048	-0.00500089	0.543011	0	0.525253	-0.0336347	0.592233	0.322493	0.509615	-0.155678	0.493899	-1.4816
	rs4840097	chr6	100328198	intergenic	C	T	PRDM13;MCHR2	1	1	0	1	0	0.994949	-0.216231	1	0	1	0	0.996804	-0.64641
	rs4932480	chr15	89723858	intronic	T	C	ABHD2	0.66	0.628571	-0.0117029	0.698925	0.23488	0.656566	-0.001166	0.621359	-0.225906	0.6875	0.142347	0.680709	0.472715
	rs493258	chr15	58687880	intergenic	T	C	AQP9;LIPC	0.27	0.280952	0	0.27957	0	0.262626	-0.0174448	0.325243	0.336778	0.206731	-0.614952	0.257118	-0.278704
	rs522162	chr6	31919917	UTR3	T	C	NELFE	0.058	0.0619048	0	0.0537634	0	0.0505051	-0.0438323	0.0485437	-0.0877348	0.0721154	0.250134	0.0864881	2.01932
	rs541862	chr6	31916951	intronic	T	C	CFB	0.059	0.0619048	0	0.0537634	0	0.0505051	-0.0368286	0.0533981	-0.0154939	0.0721154	0.165082	0.0867288	1.97634
	rs553169	chr5	9979084	intergenic	T	C	LINC02112;FAM173B	0.74	0.719048	-0.00500089	0.763441	0.108418	0.70202	-0.132925	0.747573	0.0172232	0.793269	0.449916	0.738676	-0.00425741
	rs55916253	chr12	31137312	intronic	C	A	TSPAN11	0.002	0	0	0	0	0.00505051	0.0693756	0.00485437	0.157538	0	0	0.00465929	0.27958
	rs55975637	chr3	99419853	ncRNA_intronic	G	A	COL8A1	0.058	0.0571429	0	0.0591398	0	0.0858586	0.256876	0.0533981	0	0.0336538	-0.362651	0.030215	-2.98531
	rs56072732	chr2	237519496	intergenic	C	T	ACKR3;LOC93463	0.062	0.047619	-0.00500089	0.145161	2.0221	0.0757576	0.0662229	0.0291262	-0.483194	0.0240385	-0.614952	0.0262085	-5.0873
	rs570618	chr1	196657064	intronic	T	G	CFH	0.95	0.961905	0.00500089	0.978495	0.473462	0.959596	0.0438323	0.927184	-0.322493	0.932692	-0.251343	0.922719	-2.01932
	rs5754227	chr22	33105817	intronic	T	C	SYN3/TIMP3	0.61	0.633333	0.00500089	0.553763	-0.384787	0.646465	0.0836573	0.563107	-0.294236	0.668269	0.445175	0.674898	2.88926
	rs6032755	chr20	44921676	intronic	G	A	CDH22	0.64	0.595238	-0.0655588	0.709677	0.548205	0.676768	0.132043	0.553398	-0.525775	0.653846	0.00449056	0.592388	-1.66174
	rs61287758	chr5	117734465	ncRNA_intronic	G	A	LINC02208	0.078	0.0761905	0	0.0913978	0.0878567	0.0454545	-0.265527	0.0776699	0	0.100962	0.267822	0.0979082	0.886879
	rs61818925	chr1	196815450	intergenic	T	G	CFHR1	0.41	0.328571	-0.362295	0.322581	-0.766389	0.484848	0.405464	0.456311	0.257147	0.456731	0.341326	0.500582	5.03932
	rs61985136	chr14	68769199	intronic	C	T	RAD51B	0.45	0.404762	-0.0655588	0.510753	0.417577	0.489899	0.132925	0.378641	-0.494731	0.471154	0.0770454	0.417538	-0.886879
	rs621313	chr11	88913663	intronic	A	G	TYR	0.4	0.347619	-0.143768	0.419355	0.0491257	0.353535	-0.132925	0.432039	0.180942	0.461538	0.473319	0.399245	0
	rs62247658	chr3	64715155	ncRNA_intronic	C	T	ADAMTS9-AS2	0.24	0.247619	0	0.306452	0.55851	0.313131	0.433693	0.194175	-0.322493	0.173077	-0.614952	0.201336	-1.57817
	rs641153	chr6	31914180	exonic	G	A	CFB	0.058	0.0619048	0	0.0537634	0	0.0505051	-0.0438323	0.0485437	-0.0877348	0.0721154	0.250134	0.0859056	1.99271
	rs6480975	chr10	54574996	intergenic	G	C	MBL2;PCDH15	0.88	0.890476	0	0.930108	1.01902	0.893939	0.0527234	0.854369	-0.322493	0.841346	-0.614952	0.861418	-0.64641
	rs6503782	chr17	55108734	intergenic	A	T	SCPEP1;RNF126P1	0.8	0.8	0	0.844086	0.346929	0.808081	0.0174448	0.771845	-0.180942	0.802885	0	0.814826	0.376117
	rs6565597	chr17	79526821	intronic	C	T	NPLOC4/TSPAN10	0.21	0.166667	-0.143768	0.236559	0.156399	0.227273	0.0438323	0.184466	-0.155687	0.216346	0	0.212333	0.0187765
	rs6571690	chr14	35371697	intergenic	G	A	BAZ1A;IGBP1P1	0.099	0.104762	0	0.123656	0.239912	0.0808081	-0.0527234	0.131068	0.322493	0.0576923	-0.614952	0.094933	-0.14234
	rs6721654	chr2	121301911	intergenic	C	T	LINC01101;GLI2	0.24	0.238095	0	0.349462	1.20745	0.292929	0.265527	0.165049	-0.525775	0.173077	-0.614952	0.212253	-0.893134
	rs67538026	chr19	1031438	intronic	C	T	CNN2	0.52	0.471429	-0.0705581	0.569892	0.305016	0.494949	-0.0527234	0.436893	-0.499409	0.620192	0.90362	0.495044	-0.565253
	rs6762009	chr3	123139034	intronic	G	C	ADCY5	0.45	0.5	0.109955	0.478495	0.108418	0.434343	-0.0438323	0.412621	-0.190441	0.423077	-0.132738	0.466899	0.302579
	rs6795735	chr3	64705365	ncRNA_intronic	C	T	ADAMTS9-AS2	0.75	0.752381	0	0.682796	-0.55851	0.686869	-0.387245	0.791262	0.257147	0.817308	0.614952	0.796339	2.01932
	rs6819266	chr4	63342270	intergenic	G	C	ADGRL3-AS1;TECRL	0.19	0.161905	-0.0199908	0.22043	0.197416	0.227273	0.132925	0.174757	-0.0633793	0.163462	-0.200495	0.140361	-2.90359
	rs6857	chr19	45392254	UTR3	C	T	NECTIN2	0.1	0.0571429	-0.724379	0.129032	0.425897	0.0808081	-0.132925	0.116505	0.180942	0.120192	0.251343	0.0903544	-0.317715
	rs7091537	chr10	73144235	intergenic	A	G	SLC29A3;CDH23	0.68	0.704762	0.00500089	0.715054	0.18829	0.70202	0.0527234	0.674757	0	0.629808	-0.374452	0.650581	-0.801997
	rs713875	chr22	30592487	intergenic	C	G	HORMAD2;LIF	0.67	0.690476	0.00500089	0.666667	0	0.671717	0	0.61165	-0.336778	0.706731	0.250134	0.708019	1.23191
	rs7182946	chr15	31394868	intronic	G	T	TRPM1	0.96	0.971429	0.00500089	0.956989	0	0.974747	0.0693756	0.956311	-0.022644	0.932692	-0.493009	0.977035	1.74093
	rs72802342	chr16	75234872	intergenic	C	A	CTRB2/CTRB1	0.13	0.119048	0	0.198925	0.837457	0.161616	0.132925	0.11165	-0.100416	0.0865385	-0.473319	0.112144	-0.667071
	rs73036519	chr19	45748362	intergenic	G	C	EXOC3L2/MARK4	0.001	0	0	0	0	0.00505051	0.132925	0	0	0	0	0.000291206	-0.279502
	rs73296436	chr12	25617158	intergenic	T	A	KRAS;LMNTD1	0.055	0.0285714	-0.143768	0.0698925	0.18829	0.0858586	0.338594	0.0436893	-0.0877348	0.0480769	0	0.032615	-2.02266
	rs741449	chr19	29738641	intergenic	C	T	UQCRFS1;LOC284395	0.77	0.780952	0	0.806452	0.239912	0.782828	0.023349	0.747573	-0.117887	0.745192	-0.142347	0.699593	-3.85413
	rs7676999	chr4	116934079	intergenic	C	T	NDST4;MIR1973	0.14	0.104762	-0.129967	0.107527	-0.239912	0.166667	0.132925	0.160194	0.155687	0.149038	0.00562626	0.114153	-1.11346
	rs77360121	chr3	2092106	intergenic	A	G	CNTN6;CNTN4	0.095	0.0714286	-0.0199908	0.129032	0.353657	0.106061	0.0438323	0.092233	0	0.0817308	-0.0770454	0.0714701	-1.35195
	rs7750345	chr6	106260128	intergenic	A	G	PREP;PRDM1	0.24	0.22381	0	0.274194	0.206525	0.237374	0	0.213592	-0.142046	0.278846	0.294276	0.210542	-1.0115
	rs7803454	chr7	99991548	intronic	C	T	PILRB/PILRA	0.028	0.0285714	0	0.016129	-0.150677	0.0555556	0.433693	0.00970874	-0.294236	0.0288462	0	0.022714	-0.318112
	rs79069165	chr5	75184914	intergenic	T	C	POC5;SV2C	0.032	0.0333333	0	0.0322581	0	0.0454545	0.0836573	0.038835	0.0768539	0.00961538	-0.473319	0.0339919	0.054181
	rs79590629	chr16	25996614	intronic	T	C	HS3ST4	0.11	0.12381	0.00500089	0.112903	0	0.0909091	-0.0527234	0.116505	0.0368098	0.100962	0	0.105125	-0.158498
	rs800292	chr1	196642233	exonic	G	A	CFH	0.41	0.433333	0.00500089	0.494624	0.726407	0.333333	-0.433693	0.364078	-0.257147	0.413462	0	0.420686	0.213839
	rs8017304	chr14	68785077	intronic	G	A	RAD51B	0.45	0.404762	-0.0655588	0.510753	0.417577	0.489899	0.132925	0.378641	-0.494731	0.471154	0.0770454	0.418118	-0.857479
	rs8135665	chr22	38476276	intronic	C	T	SLC16A8	0.14	0.0857143	-0.788283	0.225806	2.0221	0.191919	0.600153	0.101942	-0.495877	0.100962	-0.614952	0.10482	-2.00817
	rs843818	chr20	58268519	intronic	C	A	PHACTR3	0.2	0.233333	0.0289845	0.139785	-0.55851	0.191919	-0.0174448	0.18932	-0.0382453	0.216346	0.05634	0.275712	4.67337
	rs920915	chr15	58688467	intergenic	C	G	LIPC	0.75	0.752381	0	0.736559	-0.00731809	0.742424	-0.0174448	0.713592	-0.225906	0.8125	0.614952	0.782684	1.11346
	rs9332739	chr6	31903804	exonic	G	C	C2	0.025	0.0047619	-0.300133	0.0376344	0.229268	0.010101	-0.132925	0.0339806	0.142046	0.0384615	0.294276	0.0194994	-0.353099
	rs943080	chr6	43826627	intergenic	C	T	VEGFA	0.73	0.733333	0	0.758065	0.239912	0.792929	0.600153	0.723301	-0.0382453	0.668269	-0.650706	0.673736	-2.30882
	rs9482193	chr6	122229536	intergenic	G	T	GJA1;HSF2	0.65	0.666667	0	0.709677	0.453149	0.646465	-0.001166	0.635922	-0.0444458	0.600962	-0.347815	0.647008	-0.0398491
	rs9542236	chr13	31819325	intronic	T	C	B3GALTL	0.015	0.0047619	-0.0289845	0.0322581	0.473462	0.030303	0.265527	0.00970874	-0.0444458	0	-0.509797	0.00757135	-1.05586
	rs9564692	chr13	31821240	intronic	C	T	B3GALTL	0.71	0.714286	0	0.731183	0.0654437	0.732323	0.0527234	0.699029	-0.0471832	0.6875	-0.125144	0.731998	0.542328
	CHS: Southern Han Chinese, China, CDX: Chinese Dai in Xishuangbanna, China, KHV: Kinh in Ho Chi Minh City, Vietnam, CHB: Han Chinese in Beijing, China, JPT: Japanese in Tokyo in 1000 genome project
	KOR: Korean Reference Genome data base, Chr: chromosome, EAF: effect allele frequency, ref allele: reference allele, alt allele: alterative allele, P-value: adjusted Fischer’s test assuming 138 hypotheses, statistical significance was set at P<0.05.
